# Supplementary material for: Effectiveness of workplace social distancing measures in reducing influenza transmission: a systematic review
Source: BMC Public Health. 2018 Apr 18;18:518. doi: 10.1186/s12889-018-5446-1 (PMC5907354; doi:10.1186/s12889-018-5446-1)
Supplement: Supplementary file 3 — Table S3. Data for percentage reduction in cumulative influenza attack rate in the general population, by threshold for triggering intervention. (XLSX 14 kb) [file 12889_2018_5446_MOESM3_ESM.xlsx]

## Sheet: Table S3
Table S3. Data for percentage reduction in cumulative influenza attack rate in the general population, by threshold for triggering intervention
First author	Year published	Intervention	Ro	Threshold	Cumulative rate with intervention (%)	Cumulative rate in the absence of intervention (%)	Percentage reduction*	Data source	Comment
Zhang	2012	Single	≤ 1.9	0.02	36.3	44.47	18.3719	Figure 4	6 week intervention duration scenario
			≤ 1.9	0.25	36.3	44.47	18.3719	Figure 4	6 week intervention duration scenario
			≤ 1.9	1.5	36.6	44.47	17.6973	Figure 4	6 week intervention duration scenario
			≤ 1.9	5	37	44.47	16.7978	Figure 4	6 week intervention duration scenario
Halloran-Imp/Pitt	2008	Multiple + AV	≤ 1.9	0.0001	0.2	42.4	99.5283	Figure 3
			≤ 1.9	0.001	0.2	42.4	99.5283	Figure 3
			≤ 1.9	0.01	0.4	42.4	99.0566	Figure 3
			≤ 1.9	0.1	1.4	42.4	96.6981	Figure 3
			≤ 1.9	1	7.3	42.4	82.783	Table 2	Scenario 2
			≤ 1.9	10	29.3	42.4	30.8962	Figure 3
			2.0-2.4	0.0001	2.2	52.4	95.8015	Figure 3
			2.0-2.4	0.001	2.4	52.4	95.4198	Figure 3
			2.0-2.4	0.01	3.2	52.4	93.8931	Figure 3
			2.0-2.4	0.1	6.2	52.4	88.1679	Figure 3
			2.0-2.4	1	15.5	52.4	70.4198	Table 2	Scenario 2
			2.0-2.4	10	38.4	52.4	26.7176	Figure 3
			≥ 2.5	0.0001	21.1	58.8	64.1156	Figure 3
			≥ 2.5	0.001	21.1	58.8	64.1156	Figure 3
			≥ 2.5	0.01	21.3	58.8	63.7755	Figure 3
			≥ 2.5	0.1	22.2	58.8	62.2449	Figure 3
			≥ 2.5	1	27.4	58.8	53.4014	Table 2	Scenario 2
			≥ 2.5	10	45.4	58.8	22.7891	Figure 3
Halloran-UW/LANL	2008	Multiple + AV	≤ 1.9	0.0001	0.01	46.8	99.9786	Figure 3
			≤ 1.9	0.001	0.02	46.8	99.9573	Figure 3
			≤ 1.9	0.01	0.05	46.8	99.8932	Figure 3
			≤ 1.9	0.1	0.32	46.8	99.3162	Figure 3
			≤ 1.9	1	2.8	46.8	94.0171	Figure 3	Scenario 2
			≤ 1.9	10	20.3	46.8	56.6239	Figure 3
			2.0-2.4	0.0001	0.02	52.4	99.9618	Figure 3
			2.0-2.4	0.001	0.02	52.4	99.9618	Figure 3
			2.0-2.4	0.01	0.07	52.4	99.8664	Figure 3
			2.0-2.4	0.1	0.44	52.4	99.1603	Figure 3
			2.0-2.4	1	4.1	52.4	92.1756	Figure 3	Scenario 2
			2.0-2.4	10	24.1	52.4	54.0076	Figure 3
			≥ 2.5	0.0001	0.05	58.8	99.915	Figure 3
			≥ 2.5	0.001	0.06	58.8	99.898	Figure 3
			≥ 2.5	0.01	0.21	58.8	99.6429	Figure 3
			≥ 2.5	0.1	1.3	58.8	97.7891	Figure 3
			≥ 2.5	1	8.5	58.8	85.5442	Figure 3	Scenario 2
			≥ 2.5	10	30.9	58.8	47.449	Figure 3
Halloran-VBI	2008	Multiple + AV	≤ 1.9	0.0001	1.7	44.7	96.1969	Figure 3
			≤ 1.9	0.001	1.7	44.7	96.1969	Figure 3
			≤ 1.9	0.01	1.7	44.7	96.1969	Figure 3
			≤ 1.9	0.1	2	44.7	95.5257	Figure 3
			≤ 1.9	1	3.9	44.7	91.2752	Figure 3	Scenario 2
			≤ 1.9	10	20.3	44.7	54.5861	Figure 3
			2.0-2.4	0.0001	5.4	51.1	89.4325	Figure 3
			2.0-2.4	0.001	5.4	51.1	89.4325	Figure 3
			2.0-2.4	0.01	5.5	51.1	89.2368	Figure 3
			2.0-2.4	0.1	6	51.1	88.2583	Figure 3
			2.0-2.4	1	9.7	51.1	81.0176	Figure 3	Scenario 2
			2.0-2.4	10	26.3	51.1	48.5323	Figure 3
			≥ 2.5	0.0001	18.8	56.5	66.7257	Figure 3
			≥ 2.5	0.001	18.7	56.5	66.9027	Figure 3
			≥ 2.5	0.01	18.8	56.5	66.7257	Figure 3
			≥ 2.5	0.1	19	56.5	66.3717	Figure 3
			≥ 2.5	1	20.1	56.5	64.4248	Figure 3	Scenario 2
			≥ 2.5	10	28.3	56.5	49.9115	Figure 3
Milne	2008	Single	≤ 1.9	Prior to 1st case	24	33.2	27.7108	Figure 1	Data from Kelso 2009 article
			≤ 1.9	2 wks after 1st case	24.1	33.2	27.4096	Figure 1	Data from Kelso 2009 article
			≤ 1.9	4 wks after 1st case	25	33.2	24.6988	Figure 1	Data from Kelso 2009 article
			≤ 1.9	6 wks after 1st case	27	33.2	18.6747	Figure 1	Data from Kelso 2009 article
		Multiple	≤ 1.9	Prior to 1st case	2	33.2	93.9759	Figure 1	Data from Kelso 2009 article
			≤ 1.9	2 wks after 1st case	2.1	33.2	93.6747	Figure 1	Data from Kelso 2009 article
			≤ 1.9	4 wks after 1st case	4.5	33.2	86.4458	Figure 1	Data from Kelso 2009 article
			≤ 1.9	6 wks after 1st case	9	33.2	72.8916	Figure 1	Data from Kelso 2009 article
			≥ 2.5	Prior to 1st case	3	64.8	95.3704	Figure 1	Data from Kelso 2009 article
			≥ 2.5	2 wks after 1st case	7	64.8	89.1975	Figure 1	Data from Kelso 2009 article
			≥ 2.5	4 wks after 1st case	46	64.8	29.0123	Figure 1	Data from Kelso 2009 article
			≥ 2.5	6 wks after 1st case	64	64.8	1.23457	Figure 1	Data from Kelso 2009 article
Milne	2013	Multiple	≤ 1.9	Immediately after 1st case	17.2	46.6	63.0901	Table A6
			≤ 1.9	2 wks after 1st case	17.4	46.6	62.6609	Table A6
			≤ 1.9	4 wks after 1st case	24.4	46.6	47.6395	Table A6
*Percentage reduction = ((Rate in the absence of intervention - Rate with intervention)/Rate in the absence of intervention) x 100
Abbreviations: AV, antiviral treatment and prophylaxis
