# Supplementary material for: Effectiveness of workplace social distancing measures in reducing influenza transmission: a systematic review
Source: BMC Public Health. 2018 Apr 18;18:518. doi: 10.1186/s12889-018-5446-1 (PMC5907354; doi:10.1186/s12889-018-5446-1)
Supplement: Supplementary file 4 — Table S4. Data for percentage reduction in cumulative influenza attack rate in the general population, by compliance with intervention. (XLSX 11 kb) [file 12889_2018_5446_MOESM4_ESM.xlsx]

## Sheet: Table S4
Table S4. Data for percentage reduction in cumulative influenza attack rate in the general population, by compliance with intervention
First author	Year published	Intervention	Ro	Compliance (%)	Cumulative rate with intervention (%)	Cumulative rate in the absence of intervention (%)	Percentage reduction*	Data source	Comment
Mao	2011	Single	≤ 1.9	100	3.26	18.6	82.4731	Table 2	Intervention: Mon+Tue+Wed
			≤ 1.9	90	7.24	18.6	61.0753	Table 2	Intervention: Mon+Tue+Wed
			≤ 1.9	75	10.92	18.6	41.2903	Table 2	Intervention: Mon+Tue+Wed
			≤ 1.9	50	14.45	18.6	22.3118	Table 2	Intervention: Mon+Tue+Wed
			2.0-2.4	100	20.3	26.43	23.1933	Table 2	Intervention: Mon+Tue+Wed
			2.0-2.4	90	21.15	26.43	19.9773	Table 2	Intervention: Mon+Tue+Wed
			2.0-2.4	75	22.31	26.43	15.5883	Table 2	Intervention: Mon+Tue+Wed
			2.0-2.4	50	24	26.43	9.1941	Table 2	Intervention: Mon+Tue+Wed
Milne	2008	Single	≤ 1.9	100	24	33.2	27.7108	Figure S2.1
			≤ 1.9	90	24.5	33.2	26.2048	Figure S2.1
			≤ 1.9	75	25	33.2	24.6988	Figure S2.1
			≤ 1.9	50	27.5	33.2	17.1687	Figure S2.1
			≥ 2.5	100	60	64.8	7.40741	Figure S2.1
			≥ 2.5	90	60.5	64.8	6.6358	Figure S2.1
			≥ 2.5	75	61.5	64.8	5.09259	Figure S2.1
			≥ 2.5	50	63.5	64.8	2.00617	Figure S2.1
*Percentage reduction = ((Rate in the absence of intervention - Rate with intervention)/Rate in the absence of intervention) x 100
